# Supplementary material
Source: Springer Nature journal article supplement (https://www.springermedizin.de/resource/supplementary/13054_2012_735_MOESM1_ESM.pdf/9709190)

**Patients without AKI**

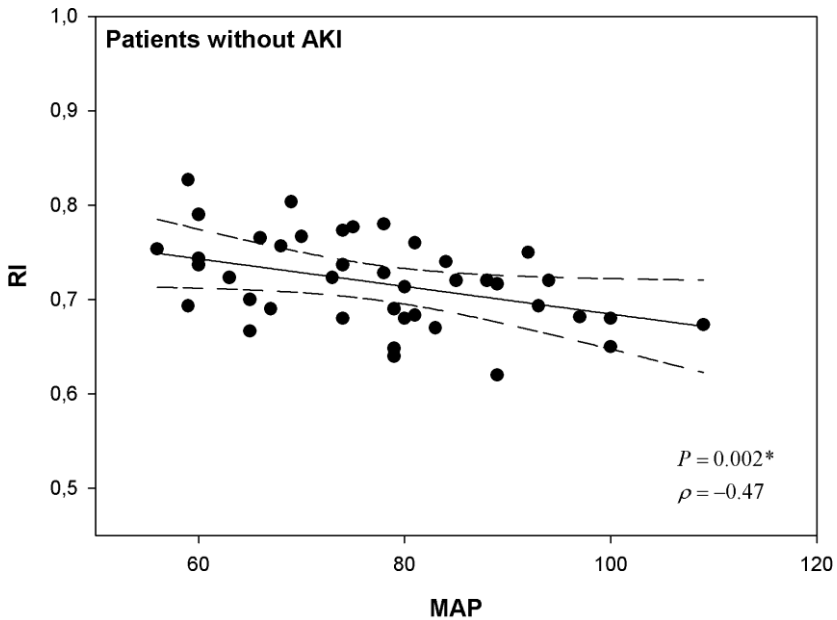

Supplement: MOESM1 [file 9709190]
